# Supplementary material for: Variant Analysis of CARD14 in a Chinese Han Population with Psoriasis Vulgaris and Generalized Pustular Psoriasis
Source: PubMed Central journal article supplement — J Invest Dermatol. 2014 Aug 7;134(12):2994–6. doi: 10.1038/jid.2014.269 (PMC4227539; doi:10.1038/jid.2014.269), 2014-08-07

## Supplemental Data

### Supplementary Materials and Methods

A total of 236 psoriasis cases of all Chinese Han origin, including 62 with GPP, 174 with PsV and 365 controls, were recruited in our study ( Table 1s). Individuals in the PsV group had at least two psoriatic scales or a single scale occupying at least 1% of the total body surface outside the scalp, and all had a history of psoriasis at least 10 years. All patients were diagnosed based on clinical and histopathological findings. Controls were unaffected individuals with no family history of psoriasis, recruited from the Health Examination Center.

This study was approved by the human medical and ethics committee of Shandong Provincial Institute of Dermatology and Venereology, and was conducted according to Declaration of Helsinki Principles. After informed consent, genomic DNA was extracted from patients' peripheral blood samples using QuickGene DNA whole blood kit L (Kurabo Industries LTD, Japan). All exons of *CARD14* gene were amplified by polymerase chain reaction(PCR) and the products were sequenced on an ABI 3130xl Genetic Analyser (Applied Biosystems ABI, Carlsbad, CA, USA).

The primers of *CARD14* (1-15 exons according to RefSeq NM\_001257970.1; the last primer according to RefSeq NM\_024110.4 block 18 for researching the SNP rs11652075) for PCR amplification were designed by Primer3 ( <http://primer3.ut.ee/>) (Table 2s) and synthesized by BGI (Shenzhen, China). The sixteen fragments were amplified by PCR. The genotyping was done by using SNaPshot (ABI Prism SNaPshot multiplex kit; Applied Biosystems) on an ABI PRISM 3130xl genetic analyser and analyzed by ABI GeneScan software. The numbering of the

variants detected in this study based on RefSeq NM\_024110.4.

Differences in allele frequencies between groups were analyzed by  $\chi^2$  and Fisher's exact tests using SPSS 17.0. Specifically, the five rare variants (p.Met119Val, p.Arg166His, p.Ala216Thr, p.Thr591Met, p.Arg682Trp) were analyzed by Fisher's exact tests (Table 1) and the four other variants (p.Asp176His, rs34367357, rs2066964, rs11652075) using  $\chi^2$  tests (Table 5s). And the p-values were corrected by using false discovery rate (FDR) with software R3.0.3. The burden test was performed using the r-project SNP-set (sequence) kernel association test (SKAT).

Corrected and nominal p-values were both presented in our test . And the significance level is  $P \leq 0.05$ .

**Table 1s. Baseline characteristics of case patients and controls**

| Type                | Male % | Age (mean ± SD) | Age at onset (mean ± SD) | Number                |
|---------------------|--------|-----------------|--------------------------|-----------------------|
| GPP                 | 61.70% | 36.65±17.59     | 33.73±19.15              | 62 (41 <sup>1</sup> ) |
| PsV                 | 50.57% | 46.30±20.70     | 29.62±21.77              | 174                   |
| Pediatric-onset PsV | 35.42% | 29.03±9.45      | 10.08±3.59               | 94                    |
| Late-onset PsV      | 68.75% | 66.58±7.83      | 52.57±5.91               | 80                    |
| Psoriasis           | 53.39% | 43.76±20.34     | 30.54±21.27              | 236                   |
| Controls            | 52.60% | 43.35±17.68     |                          | 365                   |

PsV: psoriasis vulgaris (including Pediatric-onset PsV and Late-onset PsV); GPP: generalized pustular psoriasis. 1: 41 patients had a preceding history of PsV.

**Table 2s. Primer sequences of PCR amplification for *CARD14***

| <i>CARD14</i><br>Exon | Forward primer              | Reverse primer                | Annealing<br>temperature(°C) | PCR production<br>size(bp) |
|-----------------------|-----------------------------|-------------------------------|------------------------------|----------------------------|
| 1                     | 5'-GGTTGTGACCGAACCTTGAG-3'  | 5'-GAGAGTCGTGTGTGCAGGAG-3'    | 58                           | 298                        |
| 2                     | 5'-GGGTTCTGACTGGCAAAGAG-3'  | 5'-CCCTGAAGACAGAGGCAGAC-3'    | 60                           | 438                        |
| 3                     | 5'-CAGAAAACCGTTTCACCTC-3'   | 5'-GTAGGGCAAATCGGCAAGTA-3'    | 62                           | 377                        |
| 4 <sup>1</sup>        | 5'-CTACCCACCTGCCCACCTAT -3' | 5'-CTCATGGAAGTGTGCGCTAA-3'    | 58                           | 286                        |
| 4 <sup>1</sup>        | 5'-GAGGAGCTGAACCAGGAAAA -3' | 5'-ACAAGGAAGAGGGGAAAGGA -3'   | 60                           | 371                        |
| 5                     | 5'-GGAGGAAGGGTGAGAAATGC-3'  | 5'-AGAAAGTGGGTGAGATGAGTCAC-3' | 62                           | 396                        |
| 6                     | 5'-GGGATTCTGCTTGCCTAGGG-3'  | 5'-CGGCGTGGATGAAGGAATCT-3'    | 62                           | 286                        |
| 7                     | 5'-AGAAGTGTCTCCCTCCCTCC-3'  | 5'-AGAGACAGCATGTGGACAAC-3'    | 66                           | 413                        |
| 8                     | 5'-AGTGGATGTCAGATGAGCGC-3'  | 5'-TGTCCTCCAGTGCCTCCAT-3'     | 64                           | 357                        |
| 9                     | 5'-GGTGAAATGGGTGGTGTGA-3'   | 5'-GGCTCACTTTCGTCCTGACA-3'    | 62                           | 295                        |
| 10                    | 5'-CTCAGCGCATGTGACCCCAT-3'  | 5'-CCCTGAGGTCTAGGTTGGTG-3'    | 66                           | 386                        |
| 11                    | 5'-AGGGCATCTGGGTATTGCAG-3'  | 5'-TTCCCAAAGTGCAAGGTCTGA-3'   | 62                           | 400                        |
| 12                    | 5'-AAGCATTGAGGAAGGGGTGG-3'  | 5'-GACACTCACCTCTGCTCTG-3'     | 68                           | 377                        |
| 13                    | 5'-CAGAGGGAAGCAATGGGGA-3'   | 5'-AGTGGATCTGCATCGTCTGG-3'    | 60                           | 382                        |
| 14                    | 5'-CTCTCTGGCCAGCACTATGT-3'  | 5'-TAAGGGTCATGGAGTCTGGC-3'    | 58                           | 399                        |
| 15                    | 5'-CTGAGACTGGGAGGGTCCTT-3'  | 5'-ATTCCCTGTGGGCCTCTCT-3'     | 64                           | 400                        |
| X <sup>2</sup>        | 5'-CTGCAGTGAGCAAAGCAGAC-3'  | 5'-CAGGTGAGTGTGGGAATGTG-3'    | 64                           | 399                        |

1: exon 4 of *CARD14* was divided into two fragments with two primers for its size. 2: x is the block 18 of *CARD14* according to RefSeq NM\_024110.4 for the SNP rs11652075.

**Table 3s. The known variants of *CARD14* associated with psoriasis**

| variants                  | Population     | Type of Ps  | Reference                                                                            |
|---------------------------|----------------|-------------|--------------------------------------------------------------------------------------|
| p.Glu138Ala               | European       | GPP         | Jordan <i>et al.</i> ,2012a; Jordan <i>et al.</i> ,2012b                             |
| p.Gly117Ser               | Haiti/European | GPP/PsV/PsA | Jordan <i>et al.</i> ,2012a; Jordan <i>et al.</i> ,2012b; Körber <i>et al.</i> ,2013 |
| c.349+5G>A                | Taiwan         | PsV         | Jordan <i>et al.</i> ,2012a                                                          |
| p.Arg38Cys                | European       | PsV         | Jordan <i>et al.</i> ,2012b                                                          |
| p.Glu142Lys               |                | PsV         |                                                                                      |
| p.Glu142Gly               |                | PsV         |                                                                                      |
| p.His171Asn               |                | PsV/PsA     |                                                                                      |
| p.Arg179His               |                | PsV         |                                                                                      |
| p.Val191Leu               |                | PsV         |                                                                                      |
| p.Asp285Gly               |                | PsV         |                                                                                      |
| p.Ile593Asn               |                | PsV         |                                                                                      |
| p.Arg62Gln (rs115582620)  |                | Ps          |                                                                                      |
| p.Leu150Arg (rs146214639) |                | Ps          |                                                                                      |
| p.Asp176His (rs144475004) |                | Ps          |                                                                                      |
| p.Arg682Trp (rs117918077) |                | Ps          |                                                                                      |
| p.Gly714Ser (rs151150961) |                | Ps          |                                                                                      |
| p.Asp973Glu (rs144285237) |                | Ps          |                                                                                      |
| p.Arg547Ser (rs2066964)   |                | Ps          |                                                                                      |
| p.Val585Ile (rs34367357)  |                | Ps          |                                                                                      |
| p.Arg69Gln                |                | European    |                                                                                      |
| p.Arg826Trp               | GPP /PsV       |             |                                                                                      |
| p.Ser200Asn               | European       | GPP /PsV    | Jordan <i>et al.</i> ,2012b; Körber <i>et al.</i> ,2013                              |
| p.Arg820Trp (rs11652075)  | European       | PsV/PsA     | Jordan <i>et al.</i> ,2012b                                                          |

There were 23 variants in *CARD14* according to the former research. Ps: psoriasis; PsV: psoriasis vulgaris; PsA: psoriasis arthropathica; GPP: generalized pustular psoriasis. Jordan CT, Cao L, Roberson ED *et al.* (2012a) PSORS2 is due to mutations in *CARD14*. *Am J Hum Genet* 90(5):784-95; Jordan CT, Cao L, Roberson ED *et al.* (2012b) Rare and common variants in *CARD14*, encoding an epidermal regulator of NF-kappa B, in psoriasis. *Am J Hum Genet* 90(5):796-808; Körber A, Mössner R, Renner R *et al.* (2013) Mutations in *IL36RN* in patients with generalized pustular psoriasis. *J Invest Dermatol* 133(11):2634-7

**Table 4s. Characteristics and frequencies of rare variants of *CARD14***

| <i>CARD14</i> exon | cDNA mutation                           | Corresponding protein change | Group | Protein domain | Predicted effect on protein function (score) | Risk allele frequency in cases | Risk allele frequency in controls |
|--------------------|-----------------------------------------|------------------------------|-------|----------------|----------------------------------------------|--------------------------------|-----------------------------------|
| 4                  | c.355A>G                                | p.Met119Val                  | GPP   | none           | Tolerated(0.55)                              | 0.002                          | 0                                 |
| 4                  | c.497G>A                                | p.Arg166His                  | GPP   | coiled-coil    | Tolerated(0.14)                              | 0.002                          | 0                                 |
| 4                  | c.646G>A                                | p.Ala216Thr                  | PsV   | coiled-coil    | Tolerated(0.45)                              | 0.002                          | 0                                 |
| 13                 | c.1772C>T<br>(rs200102454)              | p.Thr591Met                  | PsV   | PDZ            | Damaging(0.03)                               | 0.002                          | 0                                 |
| 15                 | c.2044C>T <sup>a</sup><br>(rs117918077) | p.Arg682Trp                  | GPP   | SH3            | Damaging                                     | 0.002                          | 0                                 |

The protein domain was identified according to the NCBI database ([http://smart.embl-heidelberg.de/smart/show\\_motifs.pl](http://smart.embl-heidelberg.de/smart/show_motifs.pl); <http://www.ncbi.nlm.nih.gov/protein/296434421>). The effects of variants were predicted by SIFT. a: The characteristic of the variant has been examined in previous studies (Jordan *et al.*, 2012b).

**Table 5s. Analysis of one low frequency variant and three common SNPs in *CARD14* by  $\chi^2$  test**

|                         | p.Asp176His   |    |    |                     | rs2066964     |     |    |                     | rs34367357    |    |    |                     | rs11652075    |     |    |                     |
|-------------------------|---------------|----|----|---------------------|---------------|-----|----|---------------------|---------------|----|----|---------------------|---------------|-----|----|---------------------|
|                         | AA            | Aa | aa | allele frequency(a) | AA            | Aa  | aa | allele frequency(a) | AA            | Aa | aa | allele frequency(a) | AA            | Aa  | aa | allele frequency(a) |
| P-PsV                   | 89            | 5  | 0  | 0.026               | 26            | 51  | 17 | 0.452               | 81            | 13 | 0  | 0.069               | 23            | 52  | 19 | 0.479               |
| L-PsV                   | 78            | 2  | 0  | 0.012               | 25            | 37  | 18 | 0.456               | 69            | 11 | 0  | 0.069               | 23            | 45  | 12 | 0.431               |
| PsV                     | 167           | 7  | 0  | 0.02                | 51            | 88  | 35 | 0.454               | 150           | 24 | 0  | 0.069               | 46            | 97  | 31 | 0.457               |
| GPP                     | 60            | 2  | 0  | 0.016               | 23            | 28  | 11 | 0.403               | 51            | 11 | 0  | 0.086               | 24            | 26  | 12 | 0.403               |
| Psoriasis               | 227           | 9  | 0  | 0.019               | 74            | 116 | 46 | 0.441               | 201           | 35 | 0  | 0.074               | 70            | 123 | 43 | 0.443               |
| Control                 | 352           | 13 | 0  | 0.018               | 113           | 168 | 84 | 0.460               | 324           | 41 | 0  | 0.056               | 106           | 166 | 93 | 0.482               |
| P(Psoriasis vs Control) | 0.872 (0.918) |    |    |                     | 0.918 (0.918) |     |    |                     | 0.195 (0.561) |    |    |                     | 0.87 (0.918)  |     |    |                     |
| P(PsV vs GPP)           | 1 (1)         |    |    |                     | 0.256 (0.438) |     |    |                     | 0.453 (0.647) |    |    |                     | 0.069 (0.438) |     |    |                     |
| P(PsV vs Control)       | 0.810 (1)     |    |    |                     | 0.764 (1)     |     |    |                     | 0.399 (0.998) |    |    |                     | 0.541 (1)     |     |    |                     |
| P(GPP vs Control)       | 1 (1)         |    |    |                     | 0.377 (0.539) |     |    |                     | 0.205 (0.342) |    |    |                     | 0.137 (0.29)  |     |    |                     |
| P(P-PsV vs L-PsV)       | 0.578 (1)     |    |    |                     | 0.604 (1)     |     |    |                     | 0.988 (1)     |    |    |                     | 0.523 (1)     |     |    |                     |

P-PsV: pediatric-onset psoriasis vulgaris; L-PsV:late-onset psoriasis vulgaris; PsV: psoriasis vulgaris (including P-PsV and L-PsV); GPP: generalized pustular psoriasis; Ps: psoriasis (including PsV and GPP). In the table, there were two types of p-values—the nominal and the corrected, of which the latter were in the braces calculated by false-discovery rate.

**Figure 1s. The sequencing figures of variants in *CARD14* in PsV and GPP patients**

A:p.Met119Val ( heterozygous); B:p.Arg166His (heterozygous); C:p.Arg682Trp (heterozygous); D:p.Thr591Met ( heterozygous); E:p.Asp176His (heterozygous); F:p.Ala216Thr (heterozygous); G:p.Arg547Ser (rs2066964) (homozygous); H:p.Arg547Ser (rs2066964) (heterozygous); I:p.Arg820Trp (rs11652075) (homozygous); J:p.Arg820Trp (rs11652075) (heterozygous); K:p.Val585Ile (rs34367357) (heterozygous)

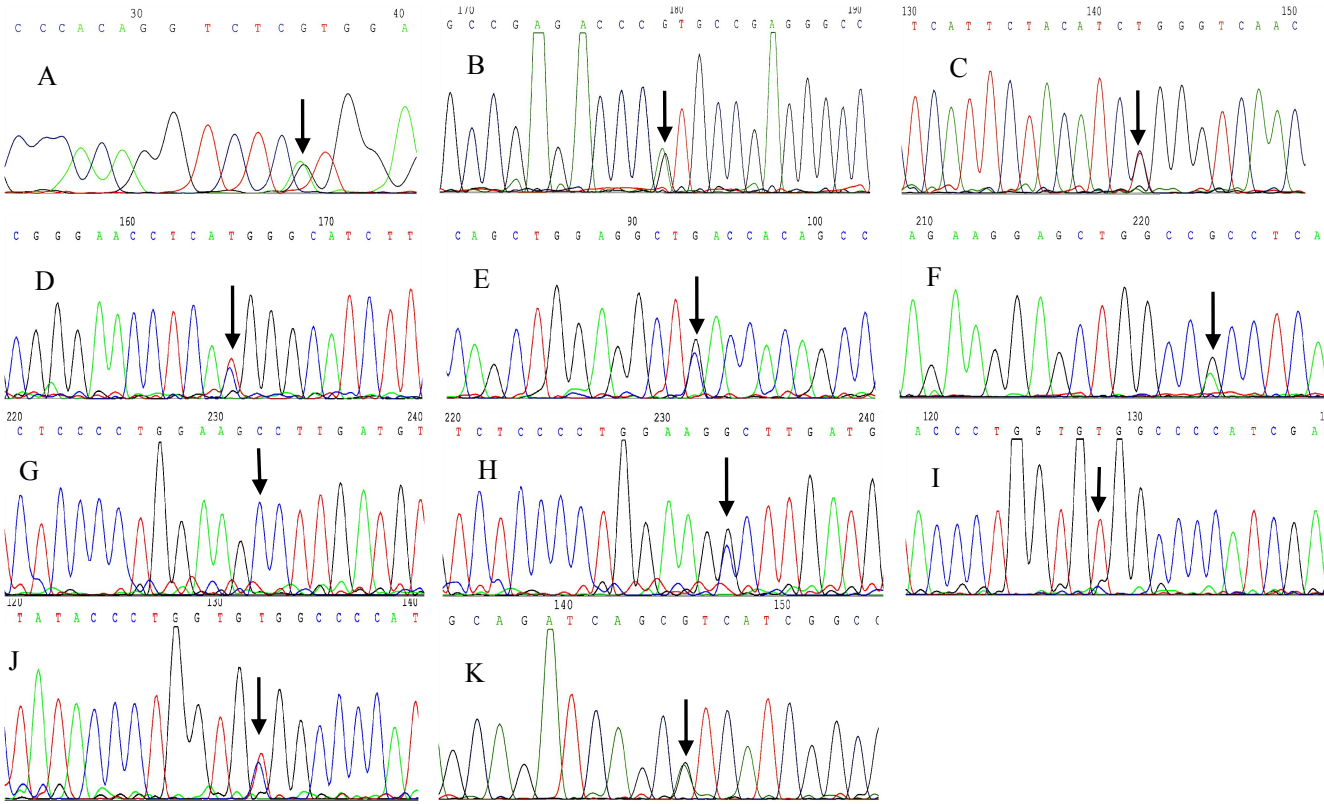

Supplement: jid2014269x1.pdf [file jid2014269x1.pdf]
